# Supplementary material for: Different functional groups modified porous organic polymers used for low concentration CO2 fixation
Source: Royal Society of Chemistry journal article supplement (doi:10.1039/d1cc03178c), 2021-01-01
Supplement: d1cc03178c1.pdf [file d1cc03178c1.pdf]

## Supplementary materials

### **Divergent functional porous organic polymers used for low concentration CO<sub>2</sub> fixation**

Zhifeng Dai,<sup>\*\*a</sup> Yuanfei Bao,<sup>+a</sup> Jindong Yuan,<sup>+a</sup> Jinzhong Yao,<sup>b</sup> and Yubing Xiong,<sup>\*a</sup>

*<sup>a</sup> Key Laboratory of Surface & Interface Science of Polymer Materials of Zhejiang Province, Department of Chemistry, College of Science, Zhejiang Sci-Tech University, Hangzhou 310018, PR China*

*<sup>b</sup> College of Biological, Chemical Sciences and Engineering, Jiaying University, Jiaying 314001, China.*

<sup>+</sup> These authors contribute equal to this work.

## Experimental Section

### Materials

The typical reagents and substrates including azobisisobutyronitrile (AIBN), bromoacetic acid, 2-bromoethylamine hydrobromide, 2-bromoethanol, ethylene chlorohydrins, and epichlorohydrin were purchased from the Shanghai Aladdin Bio-Chem Technology Co., Ltd. and Beijing InnoChem Science & Technology Co., Ltd. These reagents and substrates were purchased with high purity and used without further purification.

### Catalysts Preparation

#### **Synthesis of triphenylphosphine based porous organic polymer (POP-PPh<sub>3</sub>).**

The POP-PPh<sub>3</sub> was synthesized through a radical polymerization method from the vinyl-functionalized triphenylphosphine monomer (v-PPh<sub>3</sub>). As a typical run, 1 g of v-PPh<sub>3</sub> was dissolved in 10 mL of THF, followed by addition of 50 mg of AIBN. After maintaining in an autoclave at 100 °C for 24 h, the white powder of POP-PPh<sub>3</sub> was finally obtained after dried and used directly for the next step without further purification (0.99 g, 99.0% yield).

#### **Synthesis of amino functionalized porous organic polymer (POP-PA-NH<sub>2</sub>).**

The polar group functionalized porous organic polymers were synthesized from the phosphonium reaction of triphenylphosphine based polymer POP-PPh<sub>3</sub> with the corresponding functional alkyl bromide. Typically, for the synthesis of POP-PA-NH<sub>2</sub>, 300 mg of POP-PPh<sub>3</sub> (0.88 mmol) and 180.6 mg of 2-bromoethylamine hydrobromide (0.88 mmol) were dispersed in 10 mL of toluene with stirring, then the mixture was heated to 110 °C for 48 h under N<sub>2</sub>. After cooling to room temperature, the solid was filtered and washed with CH<sub>2</sub>Cl<sub>2</sub> for several times. The solid was re-dispersed in 20 mL of triethylamine and stirred for 4 h. Then the triethylamine was removed and the solid was washed with ethyl acetate for several times, and dried under vacuum for 12 h. The product of POP-PA-NH<sub>2</sub> was obtained as orange solid (344.5 mg, 88.8% yield). The weight content of Br<sup>-</sup> species was calculated to be 8.3 wt%.

The content of the Br<sup>-</sup> species in the porous organic polymers were calculated according to the following equation:

$$w(\text{Br}^-) = \frac{m_p - m_s}{M_{\text{PG}}} \times M_{\text{Br}} \div m_p \times 100\%$$

In which the  $m_p$  and  $m_s$  represent the amount of the yield products and the substrates used for the phosphonium reaction, respectively.  $M_{\text{PG}}$  represents the molecular weight of the decorated polar group (PG).  $M_{\text{Br}}$  represents the atomic weight of the Br<sup>-</sup> species.

**Synthesis of carboxylic acid functionalized porous organic polymer (POP-PA-COOH).** For the synthesis of POP-PA-COOH, 300 mg of POP-PPh<sub>3</sub> (0.88 mmol) and 244.5 mg of bromoacetic acid (1.76 mmol) were dispersed in 10 mL of toluene with stirring, then the mixture was heated to 110 °C for 48 h under N<sub>2</sub>. After cooling to room temperature, the solid was filtered and washed with ethyl acetate for several times. After dried under vacuum for 12 h, the product POP-PA-COOH was obtained as orange solid (372.6 mg, 87.7 % yield). The content of Br<sup>-</sup> species in the porous organic polymer was calculated to be 11.2 wt% accordingly.

**Synthesis of hydroxyl group functionalized porous organic polymer (POP-PA-OH).** For the synthesis of POP-PA-OH, the process was similar to the previous polymer, except 220.0 mg of 2-bromoethanol (1.76 mmol) was used. The product POP-PA-OH was obtained as light yellow solid (354.5 mg, 86.4 % yield). The content of Br<sup>-</sup> species in the porous organic polymer was calculated to be 9.8 wt% accordingly.

**Synthesis of the comparison non-functionalized porous organic polymer (POP-PA-Et).** For the synthesis of POP-PA-Et, the process was similar to the previous polymer, except 250 mg of POP-PPh<sub>3</sub> and 240.0 mg of bromoethane (2.2 mmol) was used. The product POP-PA-Et was obtained as light yellow solid (282.8 mg, 85.7 % yield). The content of Br<sup>-</sup> species in the porous organic polymer was calculated to be 8.5 wt% accordingly.

### Catalytic activity test

Typically, the reactions were conducted in a Schlenk tube with 10 mmol of epoxides and CO<sub>2</sub> were purged with a balloon at 333 K over the various catalysts for 48 h. The reactants and products were determined by <sup>1</sup>H NMR spectroscopy. For catalytic evaluation under low CO<sub>2</sub> concentration, 15% CO<sub>2</sub> mixed with 85% N<sub>2</sub> in volume was used and other conditions are the same. For recycling tests, the catalyst was filtered and washed with CH<sub>2</sub>Cl<sub>2</sub> for three times, and dried in air. Then, the catalyst was used for the next run without further treatment.

### **Characterization**

Nitrogen sorption isotherms collected at 77 K were measured with a Micromeritics ASAP 2020M systems, and the samples were pre-treated under vacuum at 100 °C for 12 h. The surface areas were calculated by the Brunauer-Emmett-Teller (BET) method. CO<sub>2</sub> sorption isotherms were collected from Micromeritics ASAP2010 at 298 K and 273 K under the pressure of 1 atm CO<sub>2</sub>. Before the measurement, the samples were treated under vacuum at 100 °C for 12 h. X-ray Photoelectron Spectroscopy (XPS) spectra were performed on a Thermo ESCALAB 250 with Al K $\alpha$  irradiation at  $\theta = 90^\circ$  for X-ray sources, and the binding energies were calibrated using the C1s peak at 284.9 eV. Thermal gravimetric analysis (TGA) experiments were performed on a SDT Q600 V8.2 Build100 thermogravimetric analyzer under N<sub>2</sub> flow. Elemental analysis was carried out in the Vario micro cube Organic Element Analyzer (Elementar, Germany). The scanning electron microscopy (SEM) images of the samples were recorded on a Hitachi SU 1510 apparatus. Transmission electron microscopy (TEM) experiments were performed on a JEM-2100F field emission electron microscope (JEOL, Japan) with an acceleration voltage of 110 kV. <sup>1</sup>H NMR spectra were recorded on a Bruker Avance-400 (400 MHz) spectrometer. Chemical shifts were expressed in ppm downfield from TMS at  $\delta=0$  ppm. Solid-state cross-polarization magic angle spinning <sup>13</sup>C and <sup>31</sup>P NMR (CP/MAS NMR) spectra were recorded on a Varian infinity plus 400 M spectrometer equipped with a magic-angle spin probe in a 4-mm ZrO<sub>2</sub> rotor.

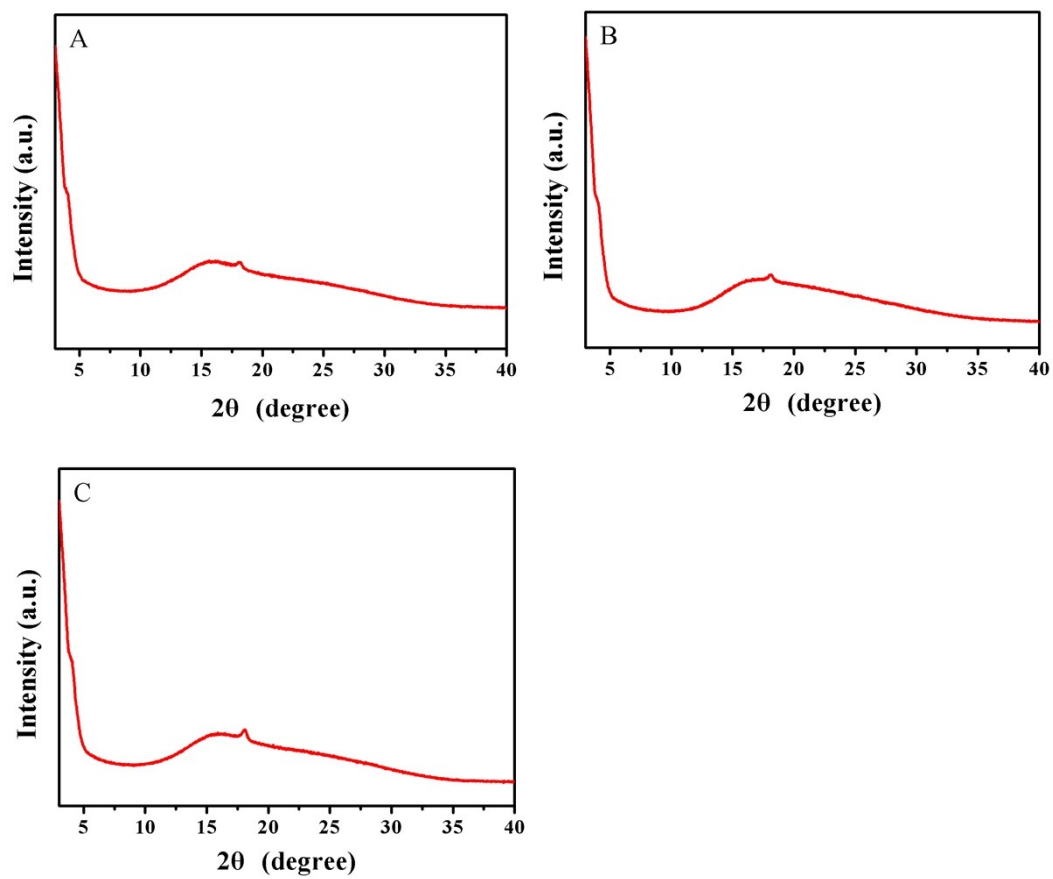

**Figure S1.** The PXRD spectrum of (A) POP-PA-NH<sub>2</sub>, (B) POP-PA-COOH, and (C) POP-PA-OH.

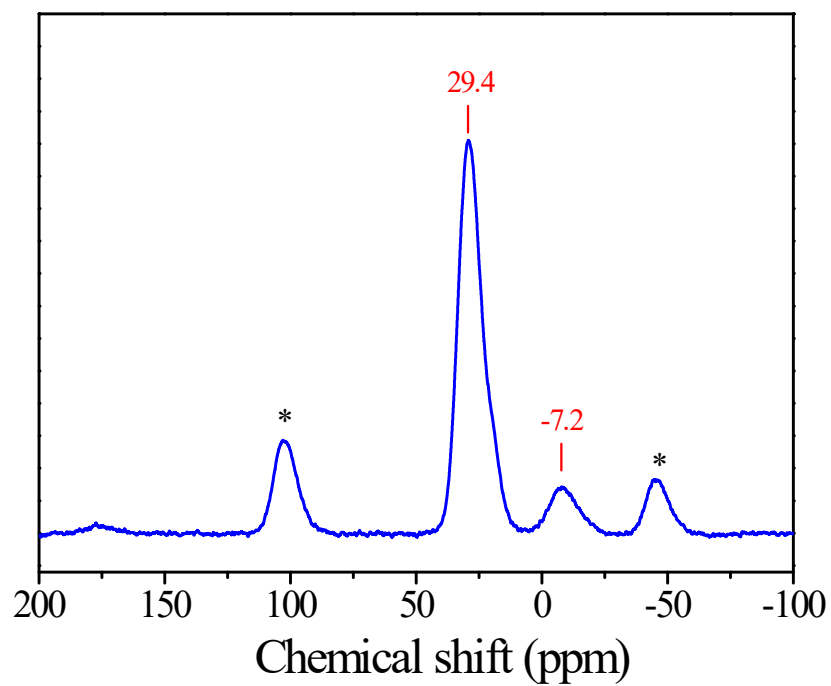

**Figure S2.** The  $^{31}\text{P}$  CP/MAS solid state NMR spectrum of POP-PA-NH<sub>2</sub>.

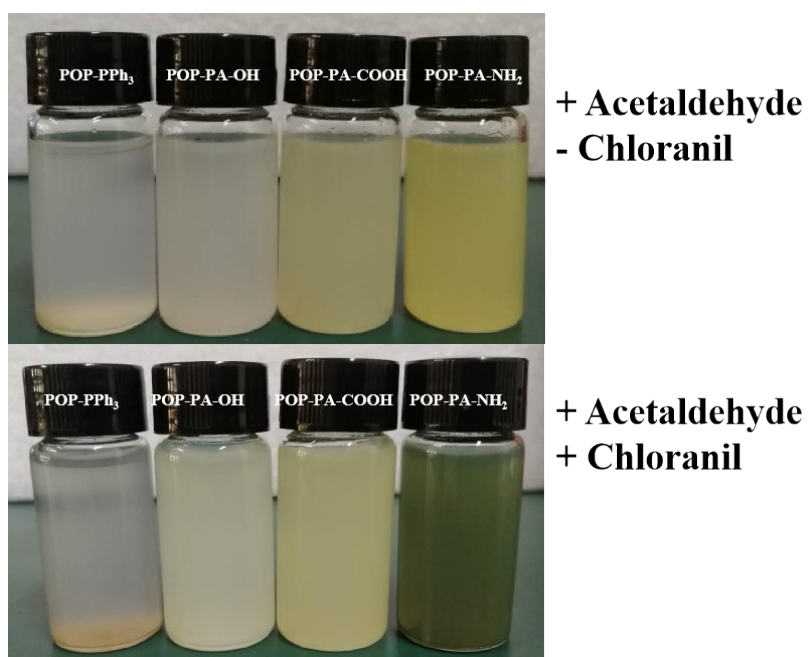

**Figure S3.** Chloranil test of POP-PPh<sub>3</sub>, POP-PA-OH, POP-PA-COOH, POP-PA-NH<sub>2</sub>. Only the vial contain polymer POP-PA-NH<sub>2</sub> turns blue-green after the addition of chloranil (5%).

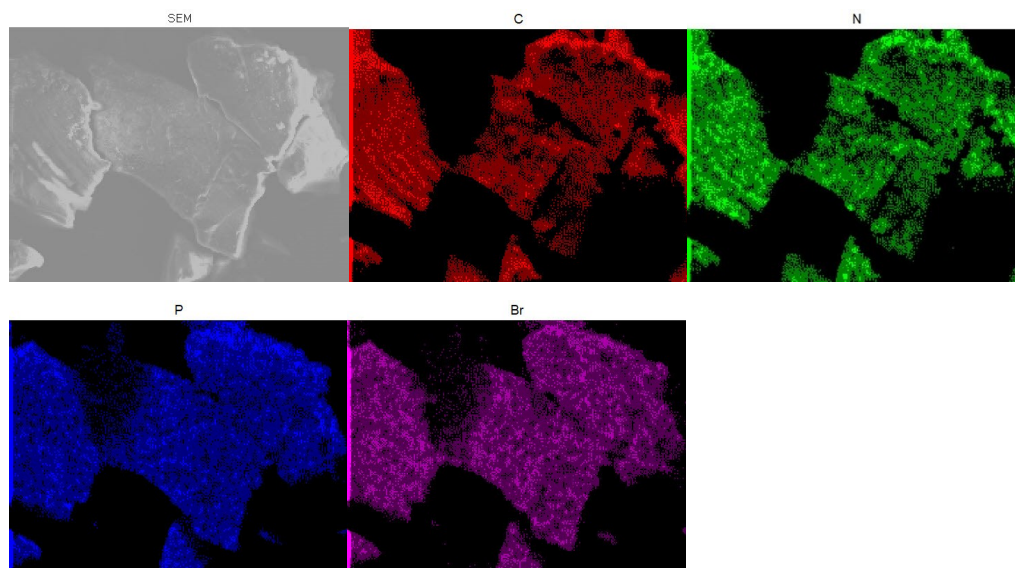

**Figure S4.** The EDS mapping of POP-PA-NH<sub>2</sub>.



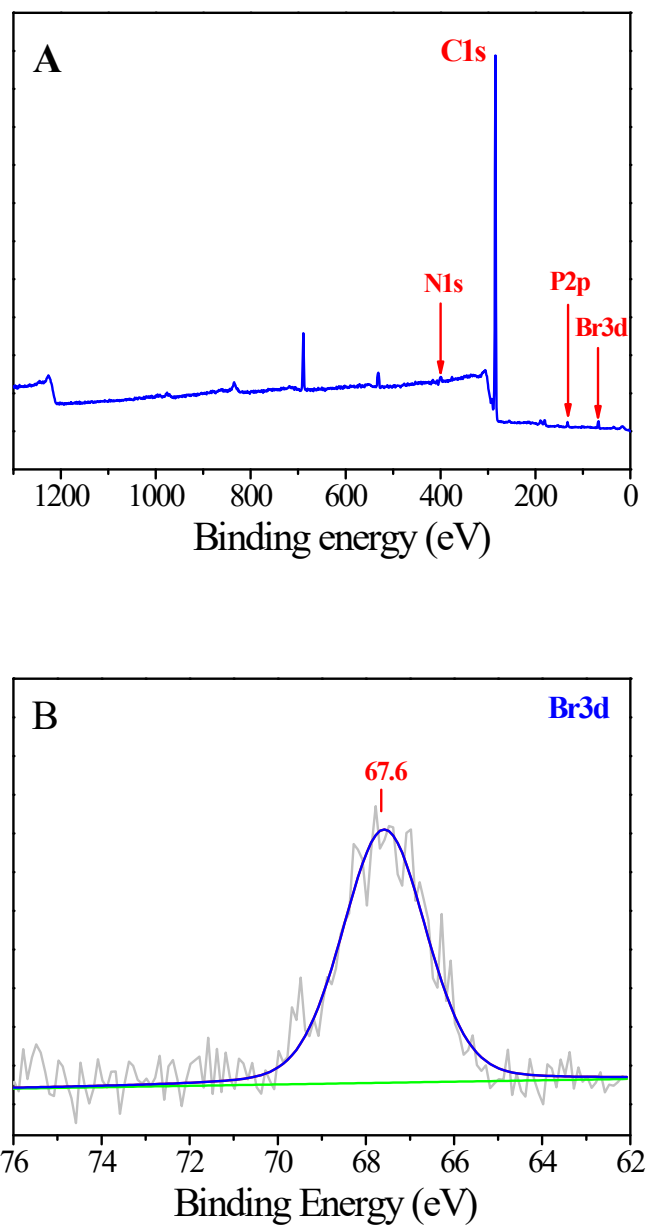

**Figure S5.** The XPS (A) survey spectrum and (B) Br3d high resolution spectra of POP-PA-NH<sub>2</sub>.

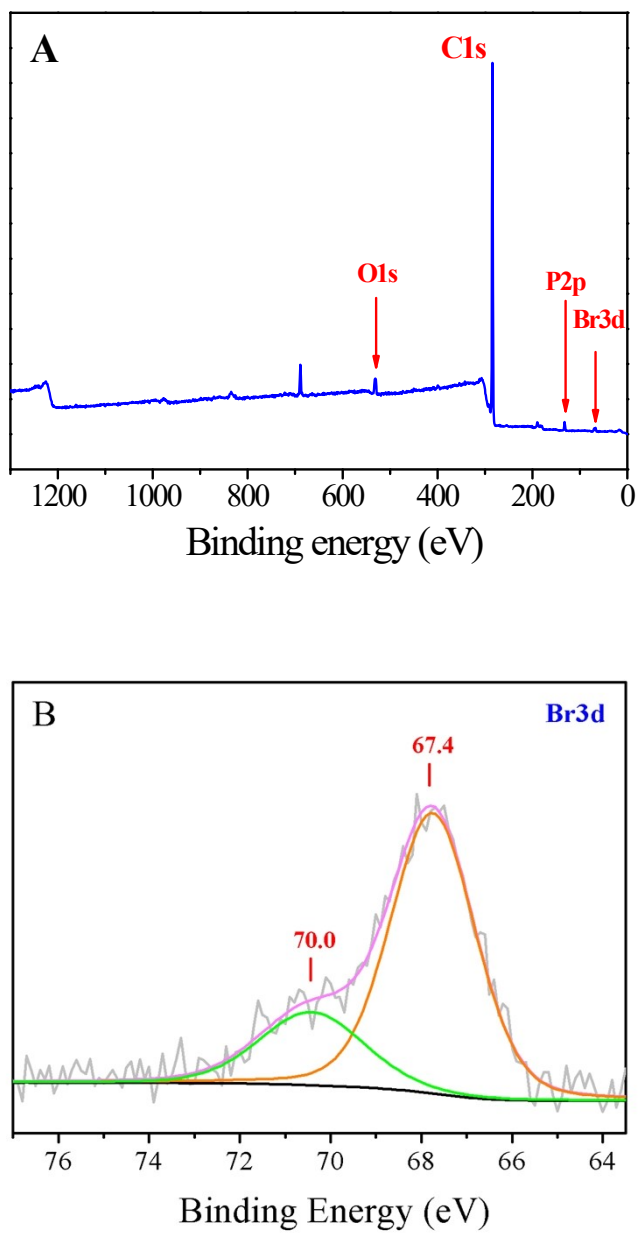

**Figure S6.** The XPS (A) survey spectrum and (B) Br3d high resolution spectra of POP-PA-COOH.

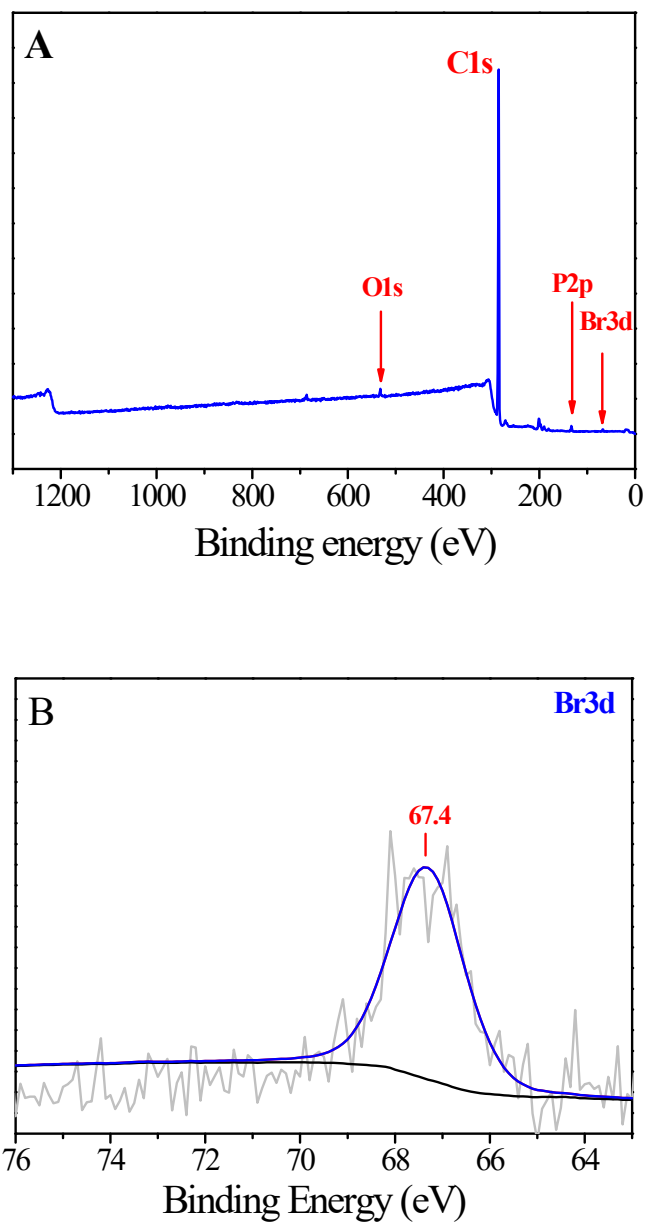

**Figure S7.** The XPS (A) survey spectrum and (B) Br3d high resolution spectra of POP-PA-OH.

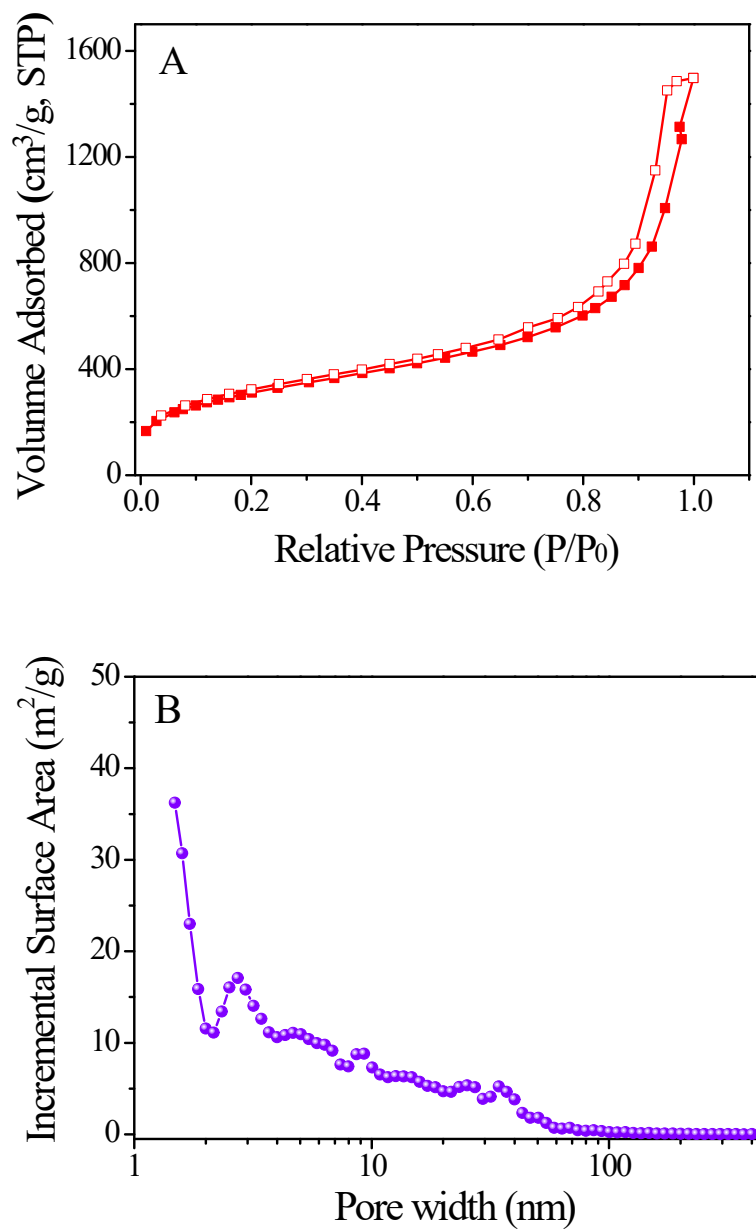

**Figure S8.** (A) N<sub>2</sub> sorption isotherms and (B) Pore size distribution of POP-PPh<sub>3</sub>. The BET surface area and pore volume of them were listed in table S1.

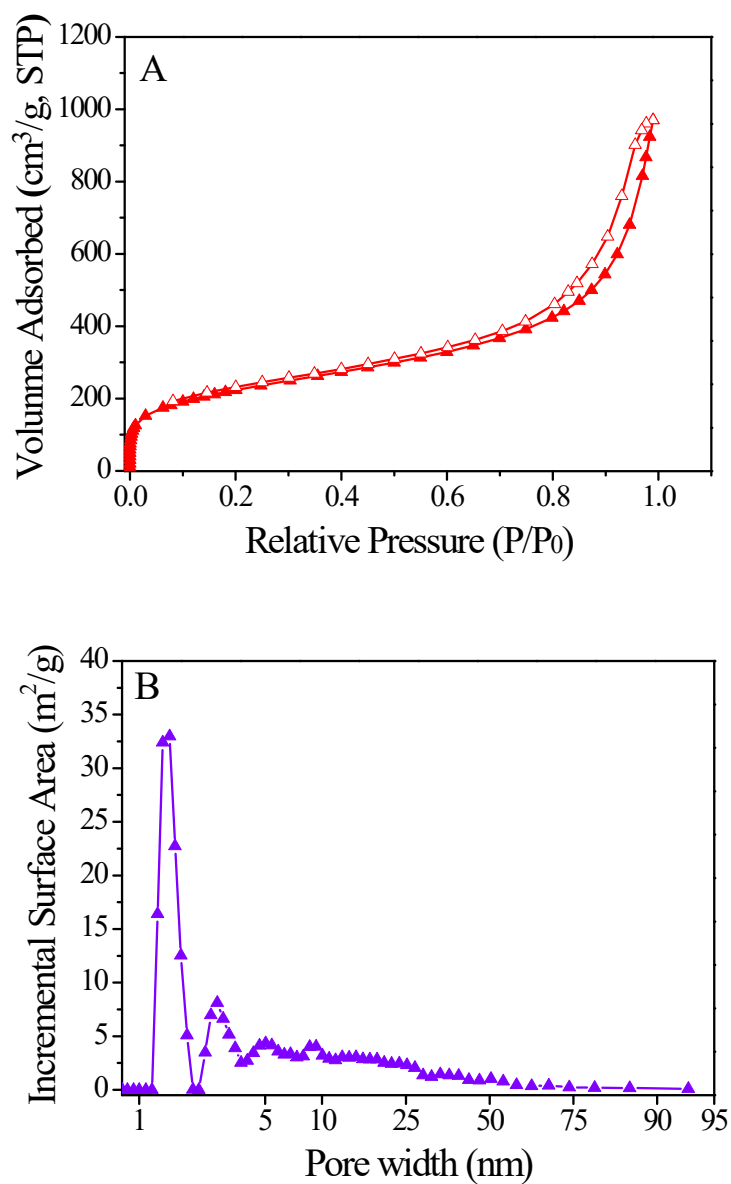

**Figure S9.** (A)  $N_2$  sorption isotherms and (B) Pore size distribution of POP-PA-COOH. The BET surface area and pore volume of them were listed in table S1.

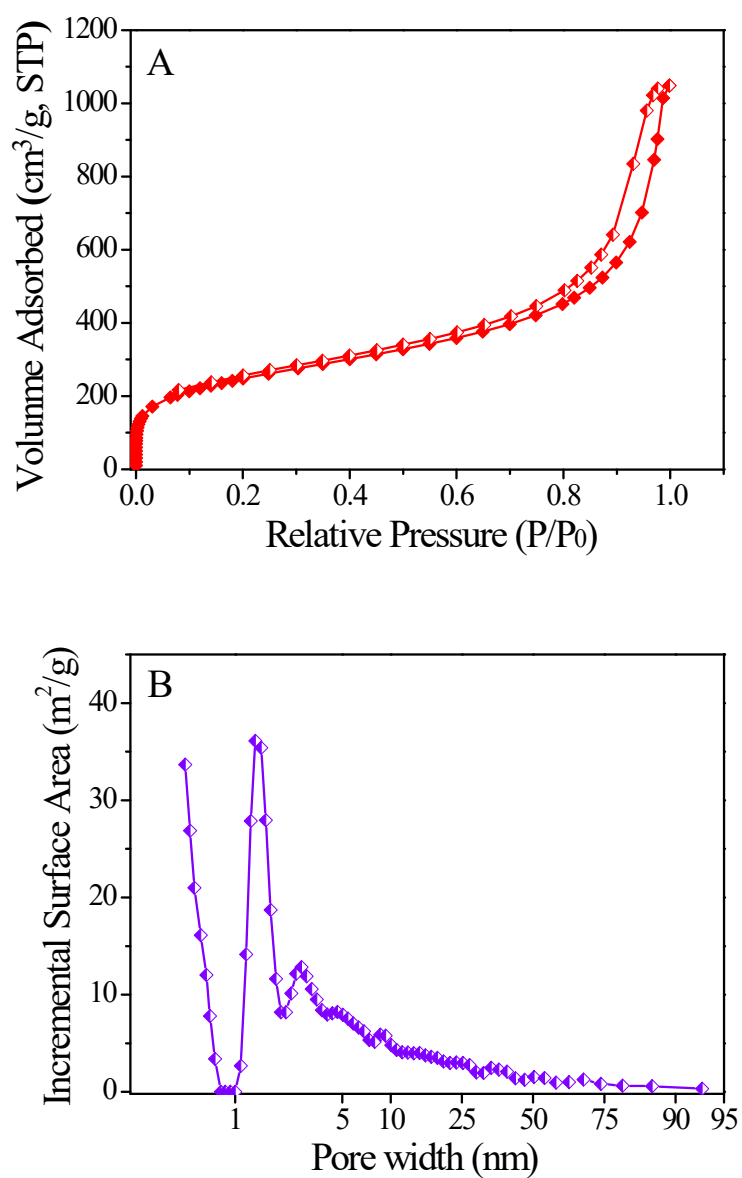

**Figure S10.** (A)  $N_2$  sorption isotherms and (B) Pore size distribution of POP-PA-OH.

The BET surface area and pore volume of them were listed in table S1.

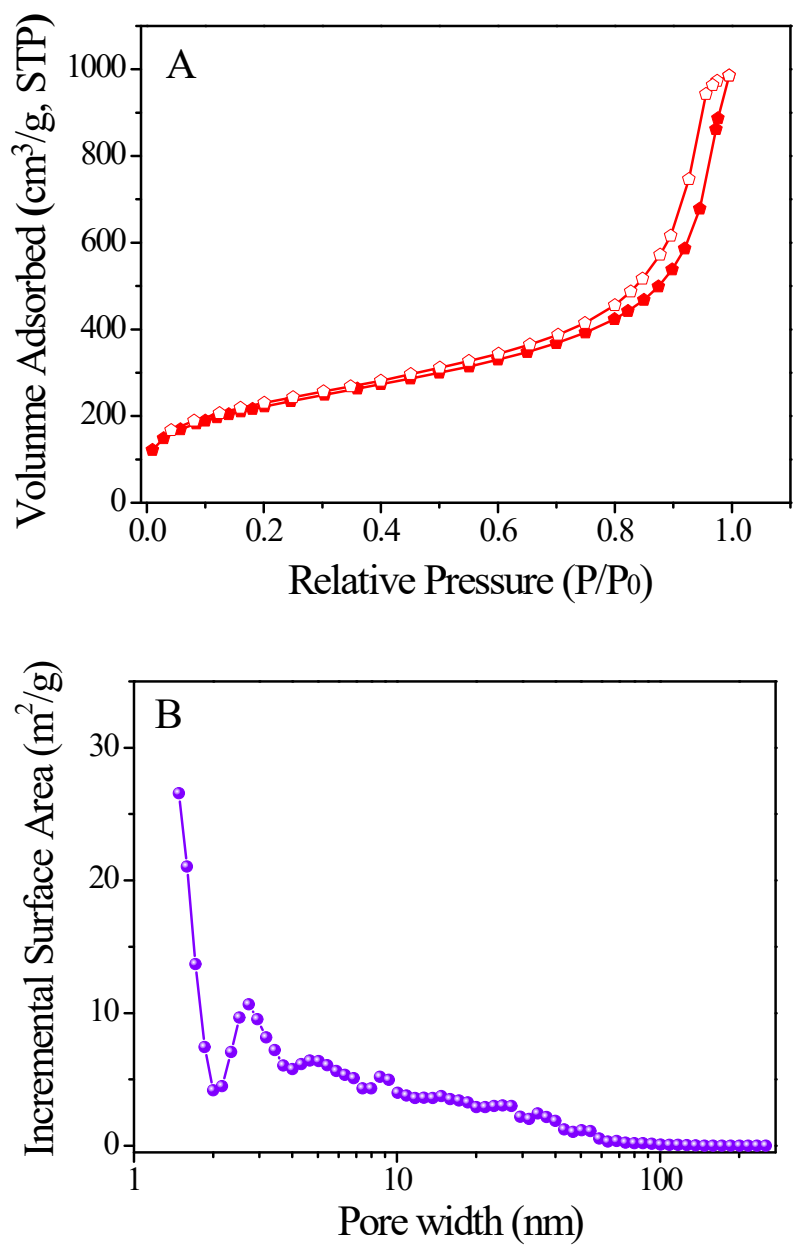

**Figure S11.** (A) N<sub>2</sub> sorption isotherms and (B) Pore size distribution of POP-PA-Et. The BET surface area and pore volume of them were listed in table S1.

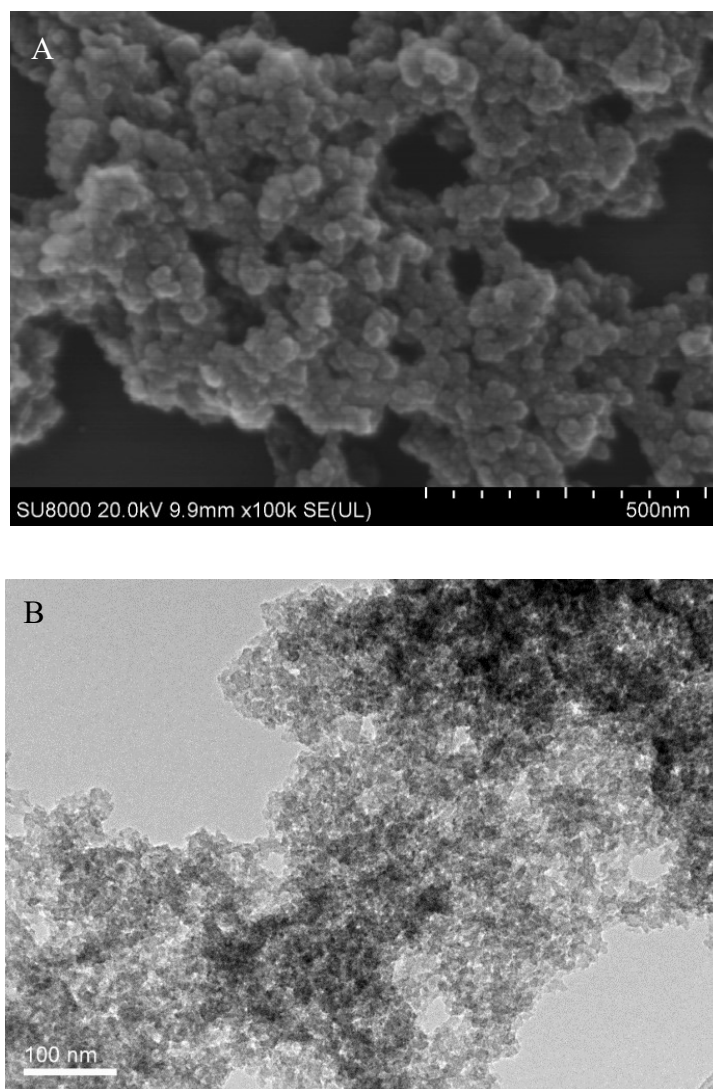

**Figure S12.** (A) SEM and (B) TEM images of POP-PA-COOH.



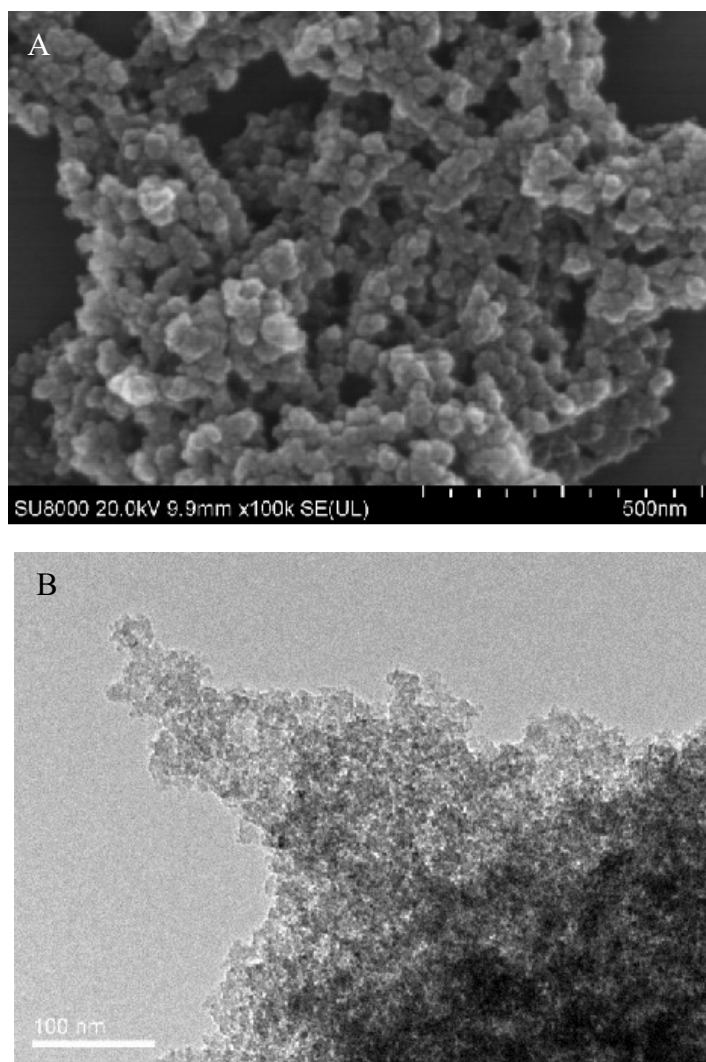

**Figure S13.** (A) SEM and (B) TEM images of POP-PA-OH.

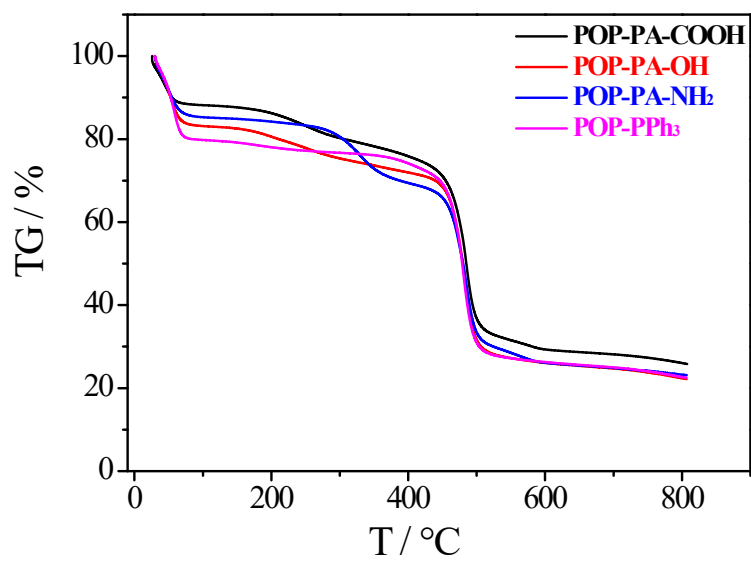

**Figure S14.** TG curves of POP-PA-NH<sub>2</sub>, POP-PA-COOH, POP-PA-OH. The weight loss at below 100 °C is due to the removal of solvent.

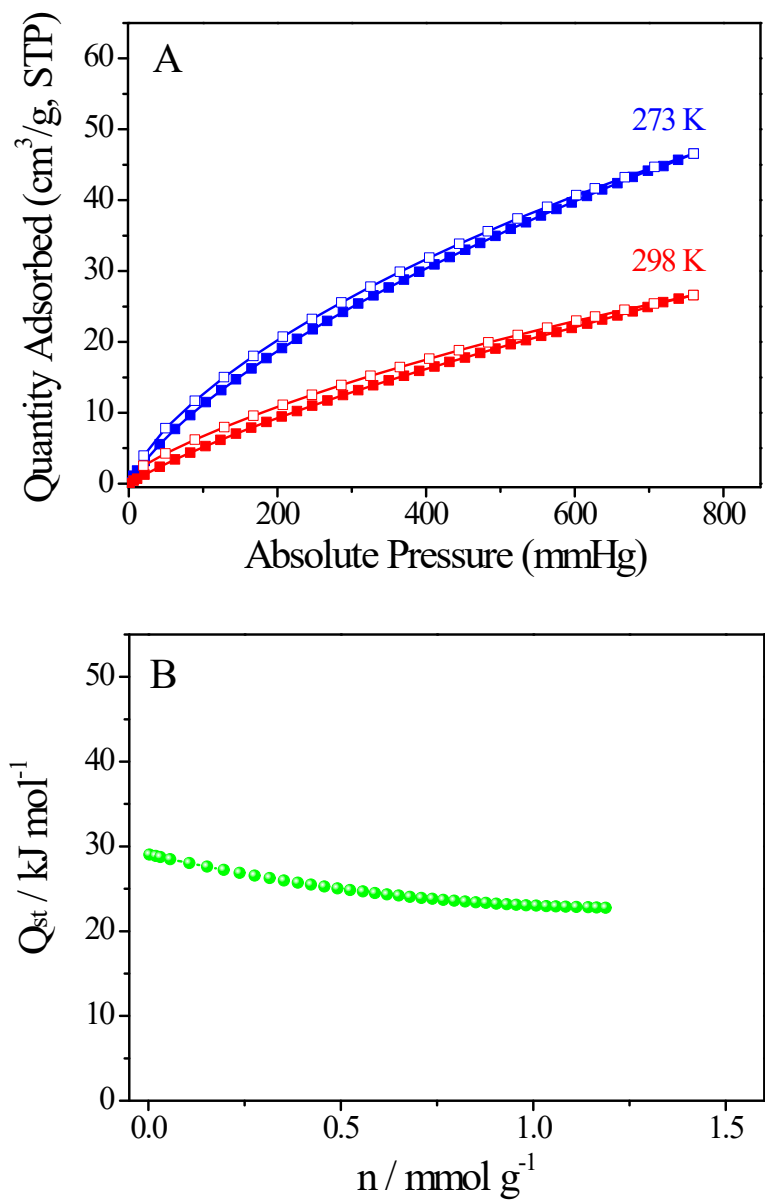

**Figure S15.** (A) The CO<sub>2</sub> sorption isotherms of POP-PPh<sub>3</sub> measured at different temperatures and (B) the calculated isosteric heat ( $Q_{st}$ ) by Virial Method.

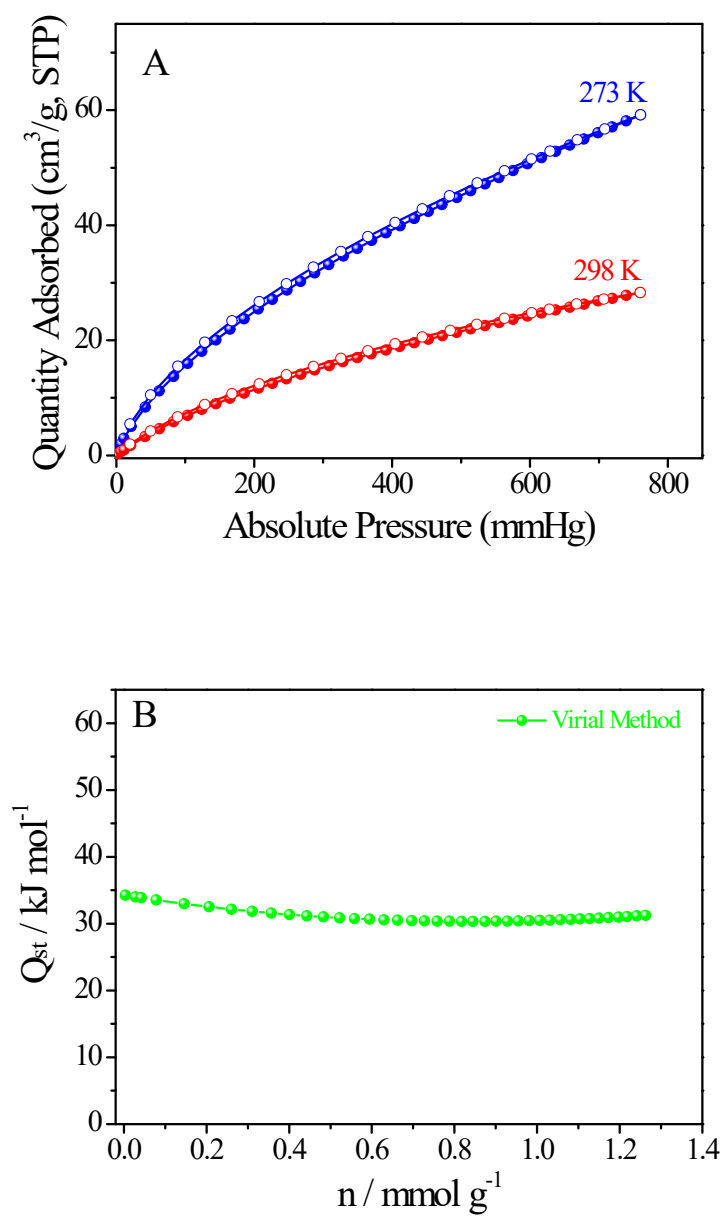

**Figure S16.** (A) The CO<sub>2</sub> sorption isotherms of POP-PA-NH<sub>2</sub> measured at different temperatures and (B) the calculated isosteric heat ( $Q_{st}$ ) by Virial Method.

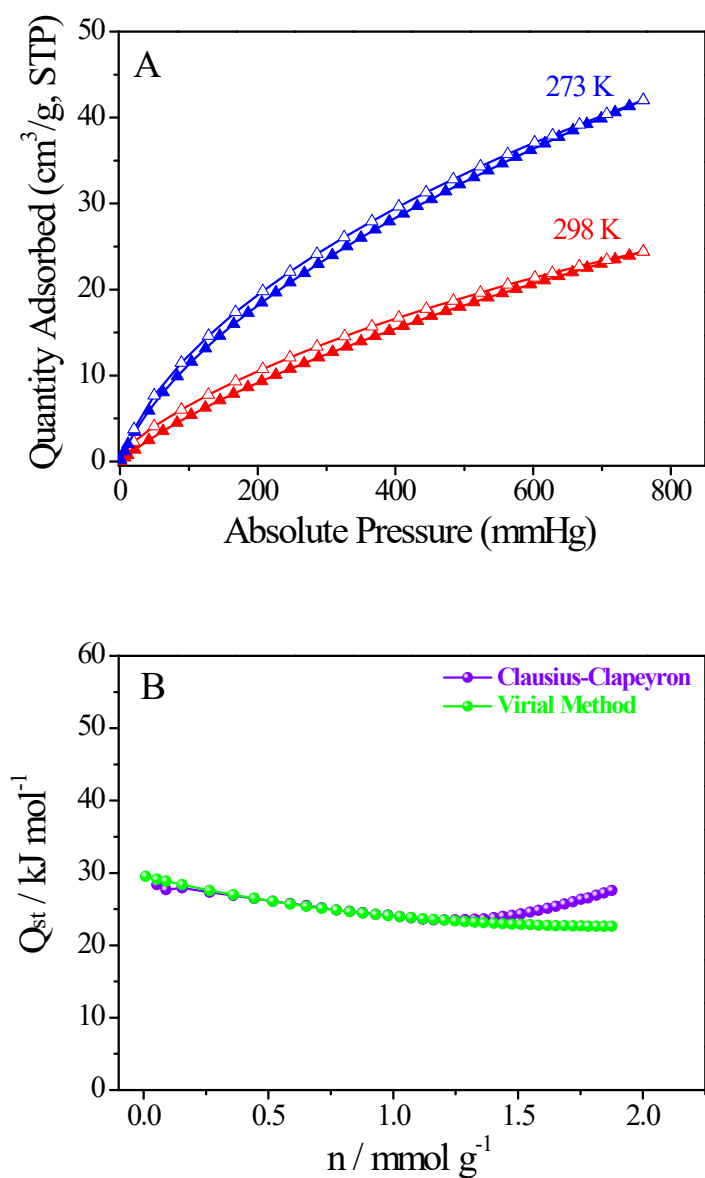

**Figure S17.** (A) The CO<sub>2</sub> sorption isotherms of POP-PA-COOH measured at different temperatures and (B) the calculated isosteric heat ( $Q_{st}$ ) by Virial Method and Clausius-Clapeyron Method.

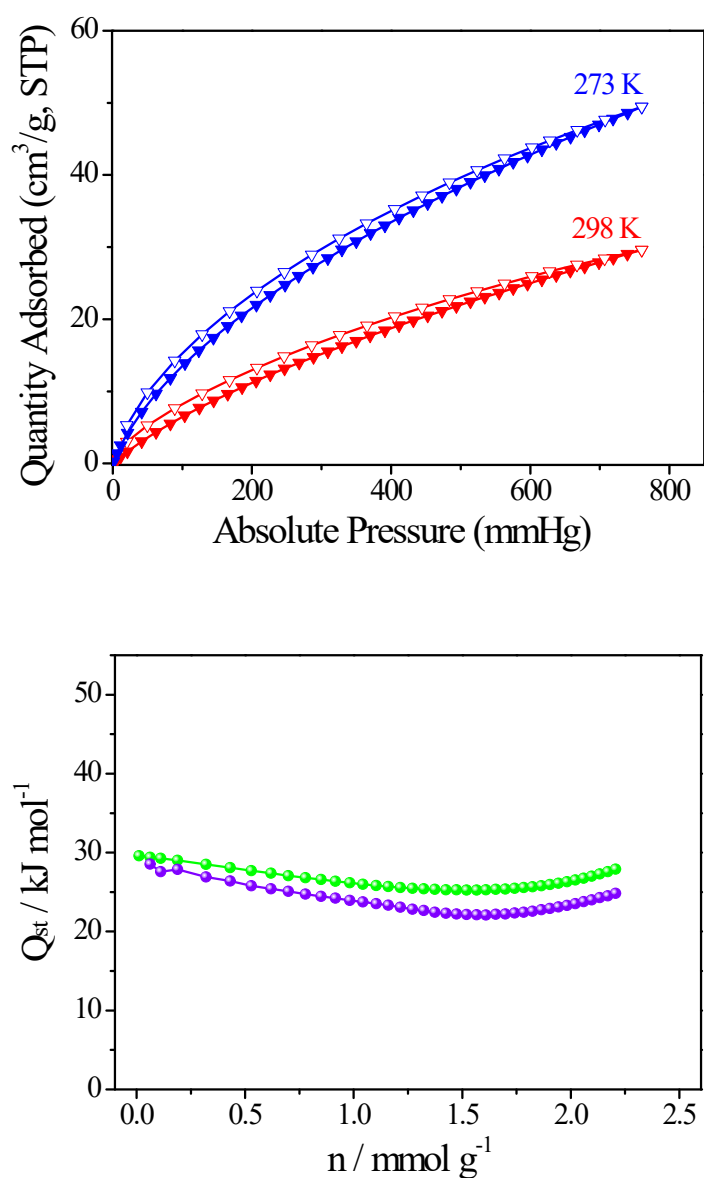

**Figure S18.** (A) The CO<sub>2</sub> sorption isotherms of POP-PA-OH measured at different temperatures and (B) the calculated isosteric heat ( $Q_{st}$ ) by Virial Method and Clausius-Clapeyron Method.

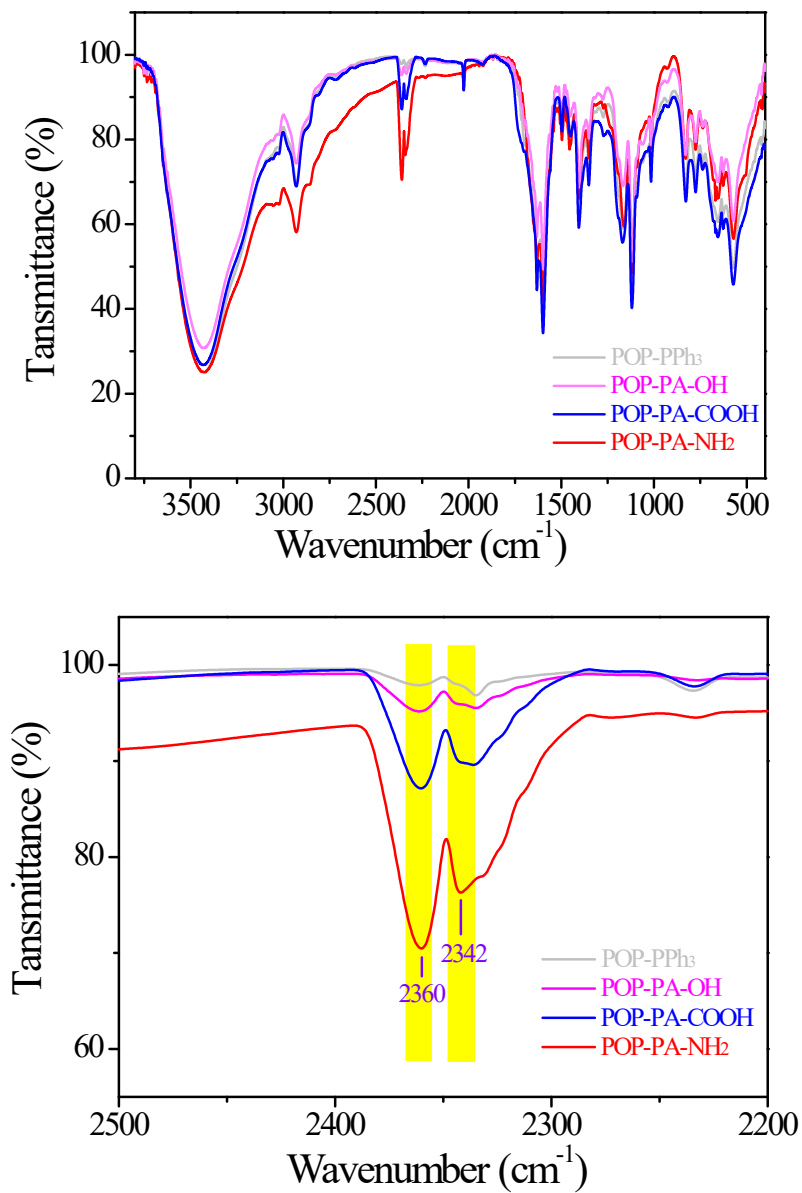

**Figure S19.** FT-IR spectrum of POP-PPh<sub>3</sub>, POP-PA-OH, POP-PA-COOH, POP-PA-NH<sub>2</sub>.

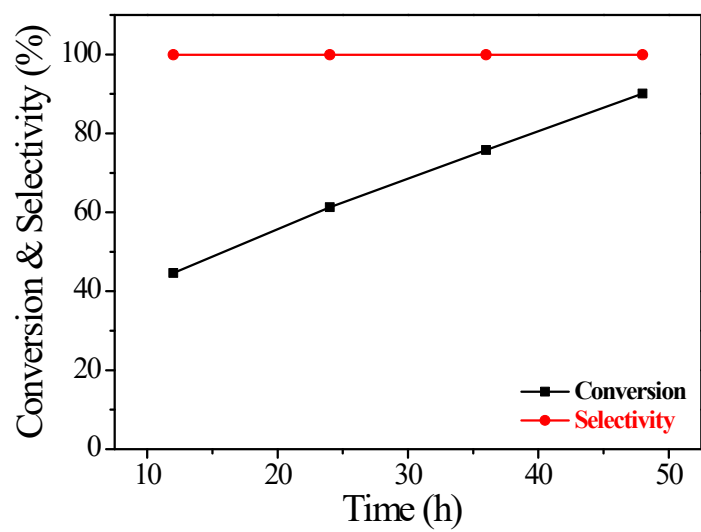

**Figure S20.** The dependences of conversion and selectivity in the cycloaddition of epichlorohydrin with CO<sub>2</sub> on reaction time over POP-PA-NH<sub>2</sub> under pure CO<sub>2</sub> (1 atm pressure) at 60 °C with catalyst loading of 1.0 mol%.



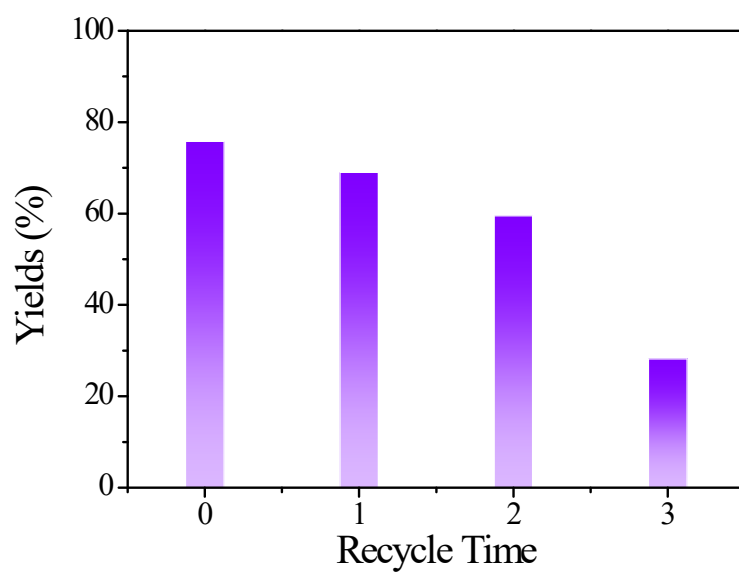

**Figure S21.** Recycle test of POP-PA-NH<sub>2</sub> in the cycloaddition of CO<sub>2</sub> with epoxides.

**Table S1.** The textural parameters of various polar groups functionalized hierarchical porous organic polymers.

| Polymers               | BET<br>(m <sup>2</sup> /g) | Pore<br>Volume<br>(cm <sup>3</sup> /g) | Element content |           |           |       |             |
|------------------------|----------------------------|----------------------------------------|-----------------|-----------|-----------|-------|-------------|
|                        |                            |                                        | C (%)           | H (%)     | N (%)     | O (%) | Br (%)      |
| POP-PPh <sub>3</sub>   | 1090                       | 2.31                                   | —               | —         | —         | —     | —           |
| POP-PA-NH <sub>2</sub> | 783                        | 1.43                                   | 66.7 (67.3)     | 6.2 (5.9) | 1.2 (3.0) | —     | 8.3 (10.6)  |
| POP-PA-COOH            | 754                        | 1.50                                   | 65.7 (65.7)     | 6.2 (5.3) | —         | 4.13  | 11.2 (12.9) |
| POP-PA-OH              | 847                        | 1.62                                   | 66.4 (67.1)     | 7.2 (5.6) | —         | 1.64  | 9.8 (10.7)  |
| POP-PA-Et              | 774                        | 1.52                                   | 67.4 (69.5)     | 7.3 (5.8) | —         | —     | 8.5 (8.6)   |

**Table S2.** CO<sub>2</sub> adsorption performances over various porous materials.

| Material               | SA <sub>BET</sub><br>(m <sup>2</sup> /g) | Adsorption capacity<br>(mg/g) |       | Q <sub>st</sub> (kJ/mol) | Ref.      |
|------------------------|------------------------------------------|-------------------------------|-------|--------------------------|-----------|
|                        |                                          | 273 K                         | 298 K |                          |           |
| POP-PPh <sub>3</sub>   | 1090                                     | 91.5                          | 52    | 29.0                     | This work |
| POP-PA-NH <sub>2</sub> | 783                                      | 116                           | 55    | 31.6                     | This work |
| POP-PA-COOH            | 754                                      | 83                            | 48    | 29.5                     | This work |
| POP-PA-OH              | 847                                      | 97                            | 58    | 29.6                     | This work |
| POP-PBnCl-TPPMg-4      | 411                                      | 55                            | 37    | 28.8                     | Ref. S1   |
| POP-PBnCl-TPPMg-12     | 462                                      | 82                            | 50.6  | 31.8                     | Ref. S1   |
| POP-BPy                | 1123                                     | 130                           | 70    | 28.0                     | Ref. S2   |
| POP-TPP                | 1200                                     | --                            | 58.3  | --                       | Ref. S3   |
| BILP-1                 | 1172                                     | 188                           | 131   | 26.5                     | Ref. S4   |
| PAF-1                  | 5640                                     | 91                            | --    | 15.6                     | Ref.S5    |
| CMP-0                  | 1018                                     | 92.4                          | 53.2  | --                       | Ref. S6   |
| TNCMP-2                | 995                                      | 115                           | 64    | --                       | Ref. S6   |
| SMPI-10                | 112                                      | 139                           | 82    | --                       | Ref. S7   |
| TPI-1                  | 809                                      | 108                           | 55    | 34.4                     | Ref. S8   |
| FJC-1                  | 1726                                     | 126                           | 81    | 20.7                     | Ref. S9   |
| Co-CMP                 | 965                                      | --                            | 79.3  | --                       | Ref. S10  |

**Table S3.** Cycloaddition of CO<sub>2</sub> with various substrates over the POP-PA-NH<sub>2</sub> catalyst<sup>a</sup>

| Entry | Epoxide                                                                           | Product                                                                           | Temperature (°C) | Time (h) | Conversion (%) <sup>b</sup> | Selectivity (%) <sup>b</sup> |
|-------|-----------------------------------------------------------------------------------|-----------------------------------------------------------------------------------|------------------|----------|-----------------------------|------------------------------|
| 1     | 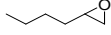 |  | 90               | 48       | 42.9                        | 99.0                         |
| 2     |  |  | 90               | 48       | 53.5                        | 99.0                         |
| 3     |  |  | 90               | 48       | 64.5                        | 99.0                         |
| 4     |  |  | 90               | 48       | 73.5                        | 99.0                         |
| 5     |  |  | 90               | 48       | 82.0                        | 99.0                         |

<sup>a</sup>Conditions: substrates (10 mmol), catalyst (1.0 mol% based on the amount of Br<sup>-</sup> species) with 1 atm CO<sub>2</sub>. <sup>b</sup>Determined by liquid NMR.

**Table S4.** Catalytic performance of POP-PA-NH<sub>2</sub>, POP-PA-COOH, and POP-PA-OH in the cycloaddition of CO<sub>2</sub> with epoxides under low CO<sub>2</sub> concentration (15% v/v with N<sub>2</sub>) conditions.<sup>a</sup>

| Entry | Catalyst               | Time (h) | Conv. (%) | Selectivity (%) |
|-------|------------------------|----------|-----------|-----------------|
| 1     | POP-PA-NH <sub>2</sub> | 24       | 27        | >99.0           |
| 2     | POP-PA-NH <sub>2</sub> | 48       | 48.1      | >99.0           |
| 3     | POP-PA-NH <sub>2</sub> | 72       | 67.6      | >99.0           |
| 4     | POP-PA-NH <sub>2</sub> | 96       | 84.7      | >99.0           |
| 5     | POP-PA-COOH            | 24       | 23.5      | >99.0           |
| 6     | POP-PA-COOH            | 48       | 39.8      | >99.0           |
| 7     | POP-PA-COOH            | 72       | 47.4      | >99.0           |
| 8     | POP-PA-COOH            | 96       | 51.2      | >99.0           |
| 9     | POP-PA-OH              | 24       | 6.8       | >99.0           |
| 10    | POP-PA-OH              | 48       | 13.1      | >99.0           |
| 11    | POP-PA-OH              | 72       | 18.8      | >99.0           |
| 12    | POP-PA-OH              | 96       | 24.2      | >99.0           |

<sup>a</sup> Conditions: epichlorohydrin (925 mg, 10 mmol), catalyst (0. 48 mol% based on the Br species), 60 °C under low CO<sub>2</sub> concentration (15% v/v with N<sub>2</sub>) and solvent free conditions.

### Supporting References:

- [1] Z. Dai, Y. Tang, F. Zhang, Y. Xiong, S. Wang, Q. Sun, L. Wang, X. Meng, L. Zhao, and F.-S. Xiao, *Chin. J. Catal.*, 2021, **42**, 618.
- [2] K. P. Divya, S. Sreejith, B. Balakrishna, P. Jayamurthy, P. Anees, A. Ajayaghosh, *Chem. Commun.* **2010**, 46, 6069-6071.
- [3] Z. Dai, † Q. Sun, † X. Liu, L. Guo, J. Li, S. Pan, C. Bian, L. Wang, X. Hu, X. Meng, L. Zhao, F. Deng, and F.-S. Xiao, *ChemSusChem* 2017, 10, 1186-1192.
- [4] Z. Dai, Q. Sun, X. Liu, C. Bian, Q. Wu, S. Pan, L. Wang, X. Meng, F. Deng, F.-S. Xiao, *J. Catal.* **2016**, 338, 202-209.
- [5] M. G. Rabbani, H. M. El-Kaderi, *Chem. Mater.* **2011**, 23, 1650-1653.
- [6] T. Ben, Y. Li, L. Zhu, D. Zhang, D. Cao, Z. Xiang, X. Yao, S. Qiu, *Energy Environ. Sci.* **2012**, 5, 8370-8376.
- [7] S. J. Ren, R. Dawson, A. Laybourn, J. X. Jiang, Y. Khimyak, D. J. Adams, A. I. Cooper, *Polym. Chem.* **2012**, 3, 928-934.
- [8] Y. Yang, Q. Zhang, Z. Zhang and S. Zhang, *J. Mater. Chem. A* **2013**, 1, 10368-10374.
- [9] M. R. Liebl, J. Senker, *Chem. Mater.* **2013**, 25, 970-980.
- [10] Y. Huang, Z. Lin, H. Fu, F. Wang, M. Shen, X. Wang, R. Cao, *ChemSusChem* **2014**, 7, 2647-2653.
- [11] Y. Xie, T.-T. Wang, X.-H. Liu, K. Zou, W.-Q. Deng, *Nat. Commun.* **2013**, 4, 1960.
